# Supplementary material
Source: PubMed Central journal article supplement (PMC5364073)
Supplement: NIHMS820907-supplement-supplement_1.pdf [file NIHMS820907-supplement-supplement_1.pdf]

**Supplementary Table 1.** Goodness-of-fit statistics for alternative biometric models for psychoneurometric and DSM-IV diagnostic symptom composite variables.

| <i>Variable</i>                           | model                   | <i>df</i>  | <i>-2LL</i>      | <i>AIC</i>       | <i>BIC (n adj)</i> |
|-------------------------------------------|-------------------------|------------|------------------|------------------|--------------------|
| THT <i>PsyNeuro</i>                       | ACE                     | 447        | 824.314          | -69.686          | -109.799           |
|                                           | <b>AE<sup>a,b</sup></b> | <b>448</b> | <b>824.314</b>   | <b>-71.686</b>   | <b>-110.967</b>    |
|                                           | CE                      | 448        | 829.264          | -66.736          | -108.492           |
|                                           | E                       | 449        | 853.632          | -44.386          | -97.475            |
| DIS <i>PsyNeuro</i>                       | ACE                     | 447        | 898.921          | 4.921            | -72.496            |
|                                           | <b>AE<sup>a,b</sup></b> | <b>448</b> | <b>899.055</b>   | <b>3.055</b>     | <b>-73.596</b>     |
|                                           | CE                      | 448        | 911.081          | 15.081           | -67.583            |
|                                           | E                       | 449        | 986.241          | 88.241           | -31.171            |
| THT <i>PsyNeuro</i> x DIS <i>PsyNeuro</i> | ACE                     | 447        | 543.724          | -350.276         | -250.094           |
|                                           | <b>AE<sup>a,b</sup></b> | <b>448</b> | <b>543.724</b>   | <b>-352.276</b>  | <b>-251.262</b>    |
|                                           | CE                      | 448        | 546.092          | -349.908         | -250.078           |
|                                           | E                       | 449        | 549.830          | -348.170         | -249.377           |
| Distress Symptoms                         | ACE                     | 464        | -585.784         | -1513.784        | -836.562           |
|                                           | <b>AE<sup>a,b</sup></b> | <b>465</b> | <b>-585.784</b>  | <b>-1515.784</b> | <b>-837.734</b>    |
|                                           | CE                      | 465        | -582.750         | -1512.750        | -836.217           |
|                                           | E                       | 466        | -565.091         | -1497.091        | -828.559           |
| Fear Symptoms                             | ACE                     | 464        | -694.277         | -1622.277        | -890.809           |
|                                           | <b>AE<sup>a,b</sup></b> | <b>465</b> | <b>-694.277</b>  | <b>-1624.277</b> | <b>-891.981</b>    |
|                                           | CE                      | 465        | -686.664         | -1616.664        | -888.174           |
|                                           | E                       | 466        | -667.353         | -1599.353        | -879.690           |
| Substance Use Symptoms                    | ACE                     | 464        | -1208.750        | -2136.750        | -1148.045          |
|                                           | <b>AE<sup>a,b</sup></b> | <b>465</b> | <b>-1208.612</b> | <b>-2138.612</b> | <b>-1149.148</b>   |
|                                           | CE                      | 465        | -1197.339        | -2127.339        | -1143.511          |
|                                           | E                       | 466        | -1142.951        | -2074.951        | -1117.489          |

*Note.* Biometric parameters were estimated for bolded models; *df* = degrees of freedom; *-2LL* = -2 times log-likelihood; *AIC* = Akaike's Information Criterion ( $\chi^2 - 2df$ ); *BIC (n adj)* = sample size adjusted Bayesian Information Criterion. THT *PsyNeuro* and DIS *PsyNeuro* = threat sensitivity and weak response inhibition assessed using neurophysiological and self-report indicators; THT *PsyNeuro* x DIS *PsyNeuro* = interaction term computed as the product of mean-centered scores for the two traits. Symptom variables reflect aggregates of symptom counts for Fear, Distress, and Substance Use disorders.

<sup>a</sup> The difference in goodness-of-fit between the full model (ACE) and reduced model (AE) did not reach significance, indicating the more parsimonious AE model was selected.

<sup>b</sup> The difference in goodness-of-fit between the E model and the full (ACE) or reduced (AE) model was significant, indicating that inclusion of the A path (reflecting a contribution of additive genetic influences) resulted in improved model fit ( $p < .05$ ).
